# Supplementary material for: The molecular basis underlying T cell specificity towards citrullinated epitopes presented by HLA-DR4
Source: Springer Nature journal article supplement (doi:10.1038/s41467-024-50511-w), 2024-07-23
Supplement: MOESM1 [file 41467_2024_50511_MOESM1_ESM.pdf]

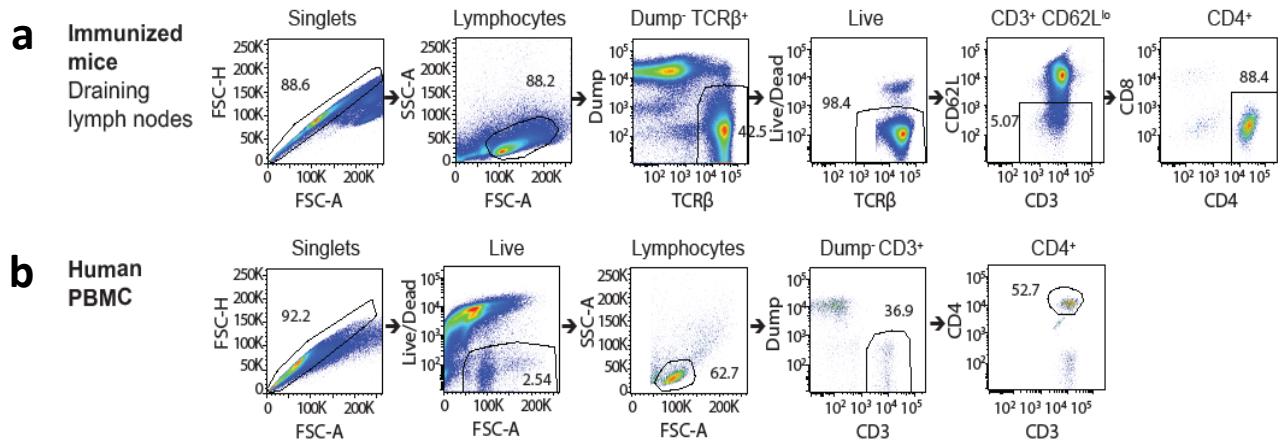

**Supplementary Fig 1. Gating strategies for sorting HLA-DR4<sup>Vim-64cit59-71</sup><sub>-</sub> and HLA-DR4<sup>α-eno-15cit10-22</sup><sub>-</sub>-specific CD4<sup>+</sup> T cells.** **a** Representative gating strategy for the detection of HLA-DR4<sup>Vim-64cit59-71</sup><sub>-</sub> and HLA-DR4<sup>α-eno-15cit10-22</sup><sub>-</sub>-specific CD4<sup>+</sup> T cells from the draining lymph nodes of immunized HLA-DR4 mice, which includes gating on CD62L<sup>lo</sup>CD3<sup>+</sup> cells prior to gating on CD4<sup>+</sup> cells. Numbers in black type indicate percentage of cells within a gate. **b** Representative gating strategy for the detection of HLA-DR4<sup>Vim-64cit59-71</sup>, HLA-DR4<sup>α-eno-15cit10-22</sup> and HLA-DR4<sup>α-eno-15cit10-22V20G</sup><sub>-</sub> specific CD4<sup>+</sup> T cells in PBMC isolated from HLA-DR4<sup>+</sup> RA donors or healthy controls. Numbers in black type indicate percentage of cells within a gate. Shown is sample from RA donor 2.

**a**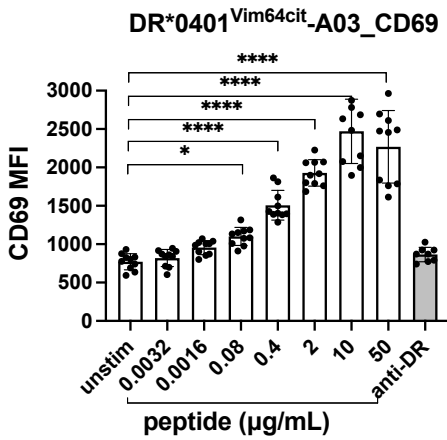**b**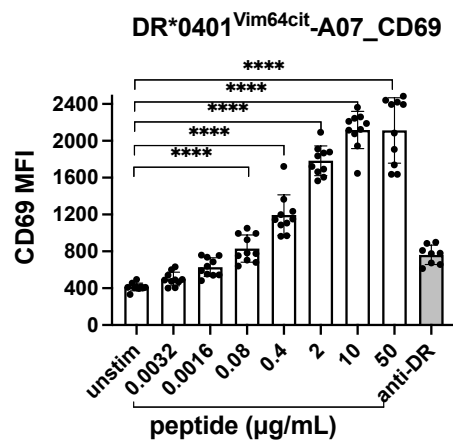

**Supplementary Fig. 2. Antigen reactivity of A03 and A07 TCRs toward HLA-DR4<sup>Vim-64cit59-71</sup>.** Expression of CD69 on the surface of **a** A03 TCR transduced SKW-3 cell lines or **b** A07 TCR transduced SKW-3 cell lines stimulated overnight with serial dilution of vim64-cit 59-71 peptide-pulsed BLCL 9031. All samples were performed in duplicates and the black dots are presented as the mean fluorescence intensity (MFI) of average of duplicated values from five independent experiments (n=5). Anti-HLA-DR4 antibody used as control. P values were determined by one way ANOVA with Dunnett's multiple comparison testing, \* $P < 0.05$ , \*\* $P < 0.01$ , \*\*\* $P < 0.002$ , \*\*\*\* $P < 0.0001$  and error bars represent  $\pm$  s.e.m.. Source data are provided as a Source Data file.

### A03 TCR\_HLA-DR4<sup>Vim-64cit59-71</sup>

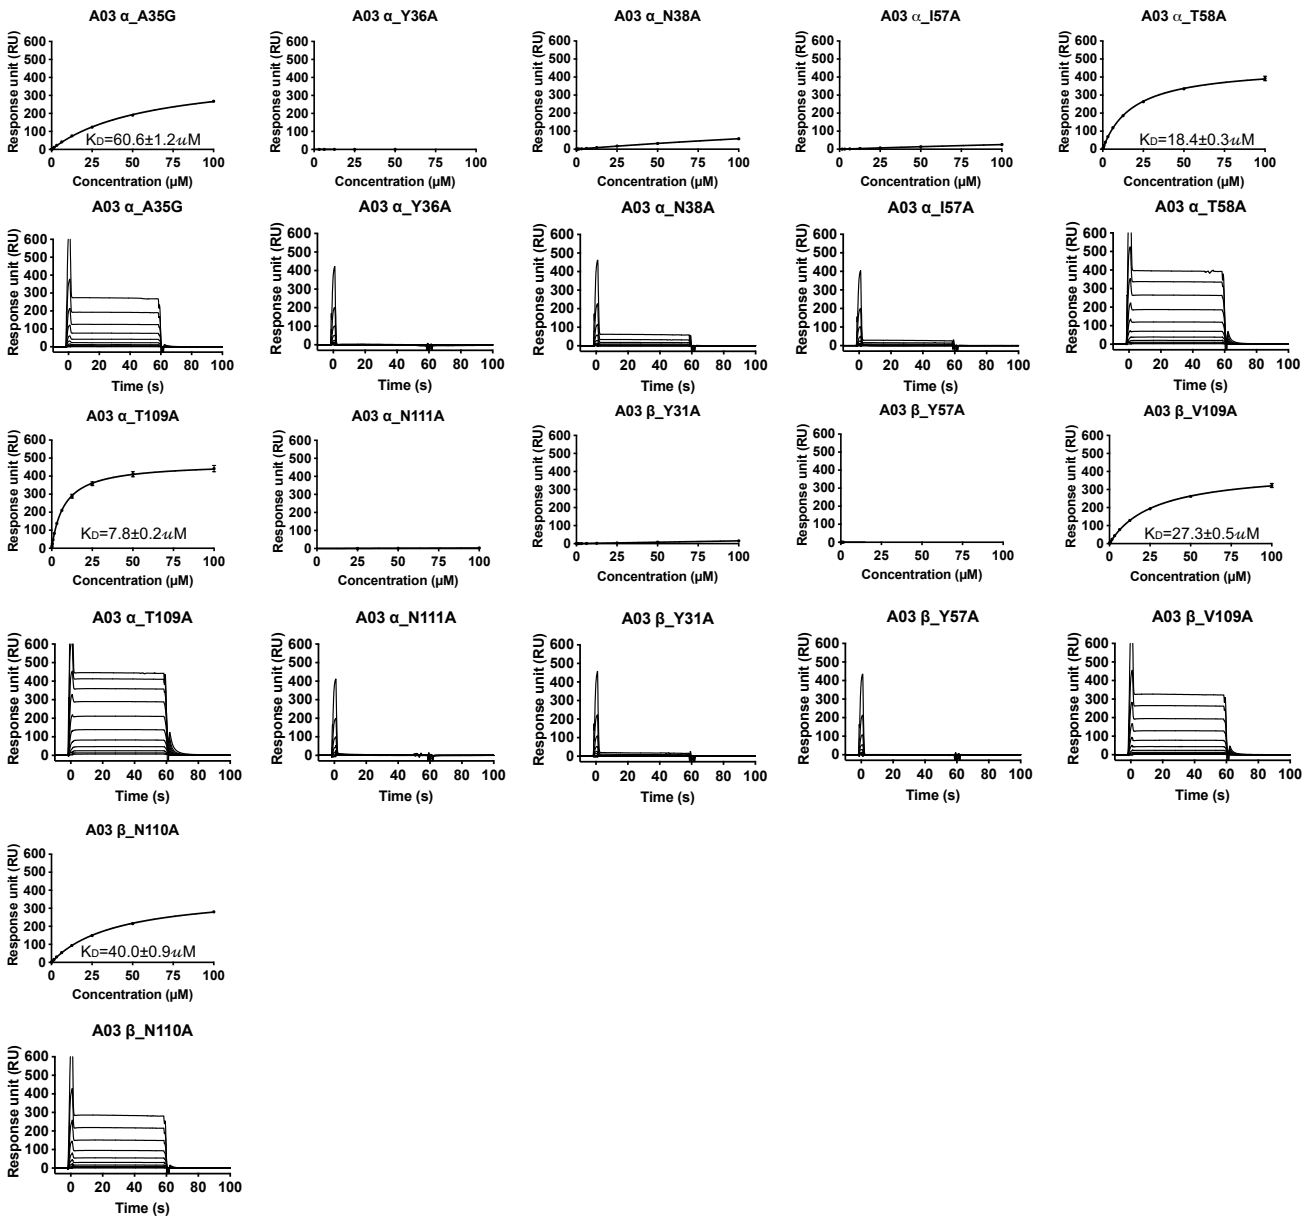

**Supplementary Fig. 3. Affinity analysis of point mutations on A03 TCR toward HLA-DR4<sup>Vim-64cit59-71</sup>.** The equilibrium affinity constants ( $K_D$ ) of A03 TCR toward HLA-DR4<sup>Vim-64cit59-71</sup> for point mutations was determined by SPR. All data derived from three independent experiments ( $n=3$ ) and a single ligand binding model was used for curve fitting. The maximal TCRs concentration used is  $100 \mu\text{M}$  equal to wild type TCR concentration. HLA-DR4<sup>CLIP</sup> was used as reference flow cell to control nonspecific binding. Equilibrium response curves were normalised against the calculated maximum response and the measurements then combined. Data are mean  $\pm$  standard error, s.e.m.. Source data are provided as a Source Data file.

## A03 TCR\_HLA-DR4<sup>Vim-64cit59-71</sup> mutants

### A03 TCR

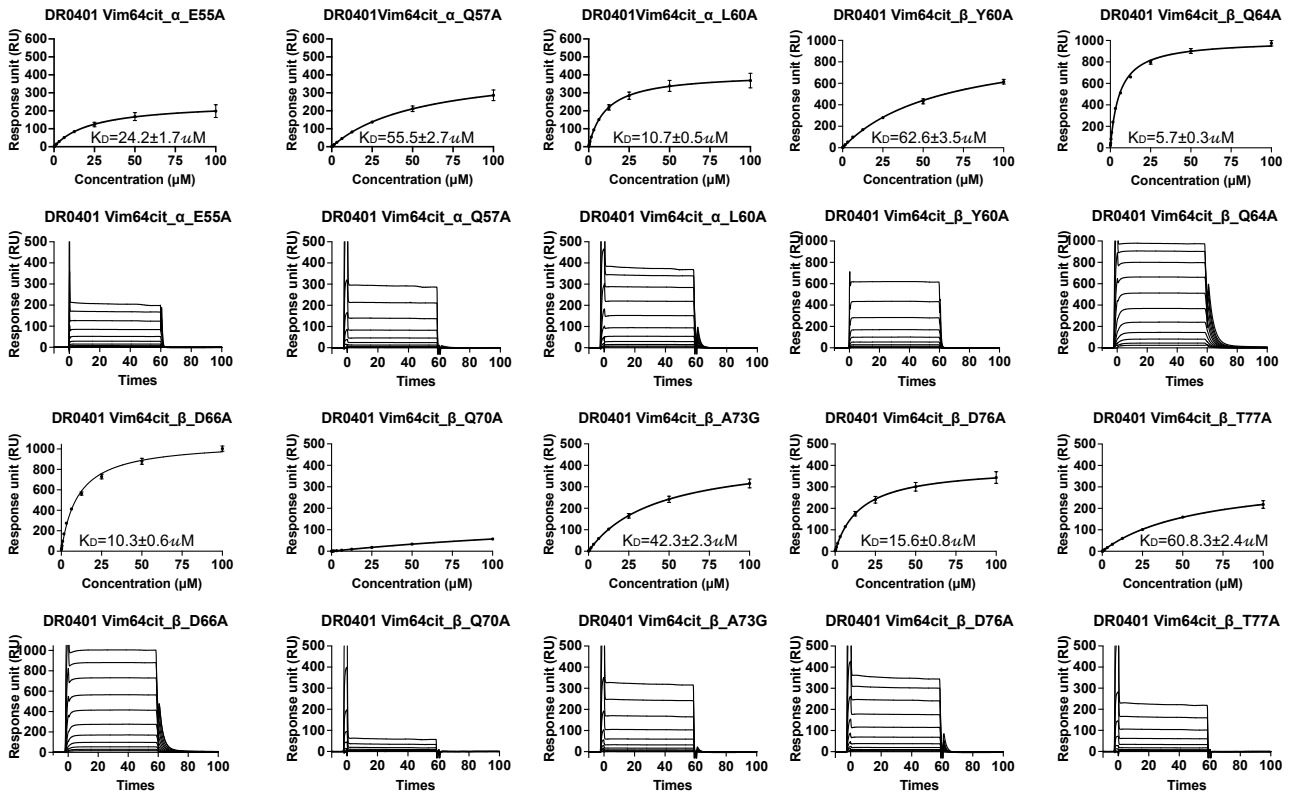

**Supplementary Fig. 4. Affinity analysis of A03 TCR toward point mutation of HLA-DR4<sup>Vim-64cit59-71</sup>.** Binding analysis of A03 TCR toward each point mutation of HLA-DR4<sup>Vim-64cit59-71</sup> was determined by SPR. All data derived from two independent experiments (n=2) and  $K_D$  determination using a single ligand binding model. To control nonspecific binding, HLA-DR4<sup>CLIP</sup> was used as reference flow cell. Equilibrium response curves were normalised against the calculated maximum response and the measurements then combined. Data are mean  $\pm$  standard error, s.e.m.. Source data are provided as a Source Data file.

## RA2.7 TCR\_HLA-DR4 $\alpha$ -eno-15cit10-22V20G

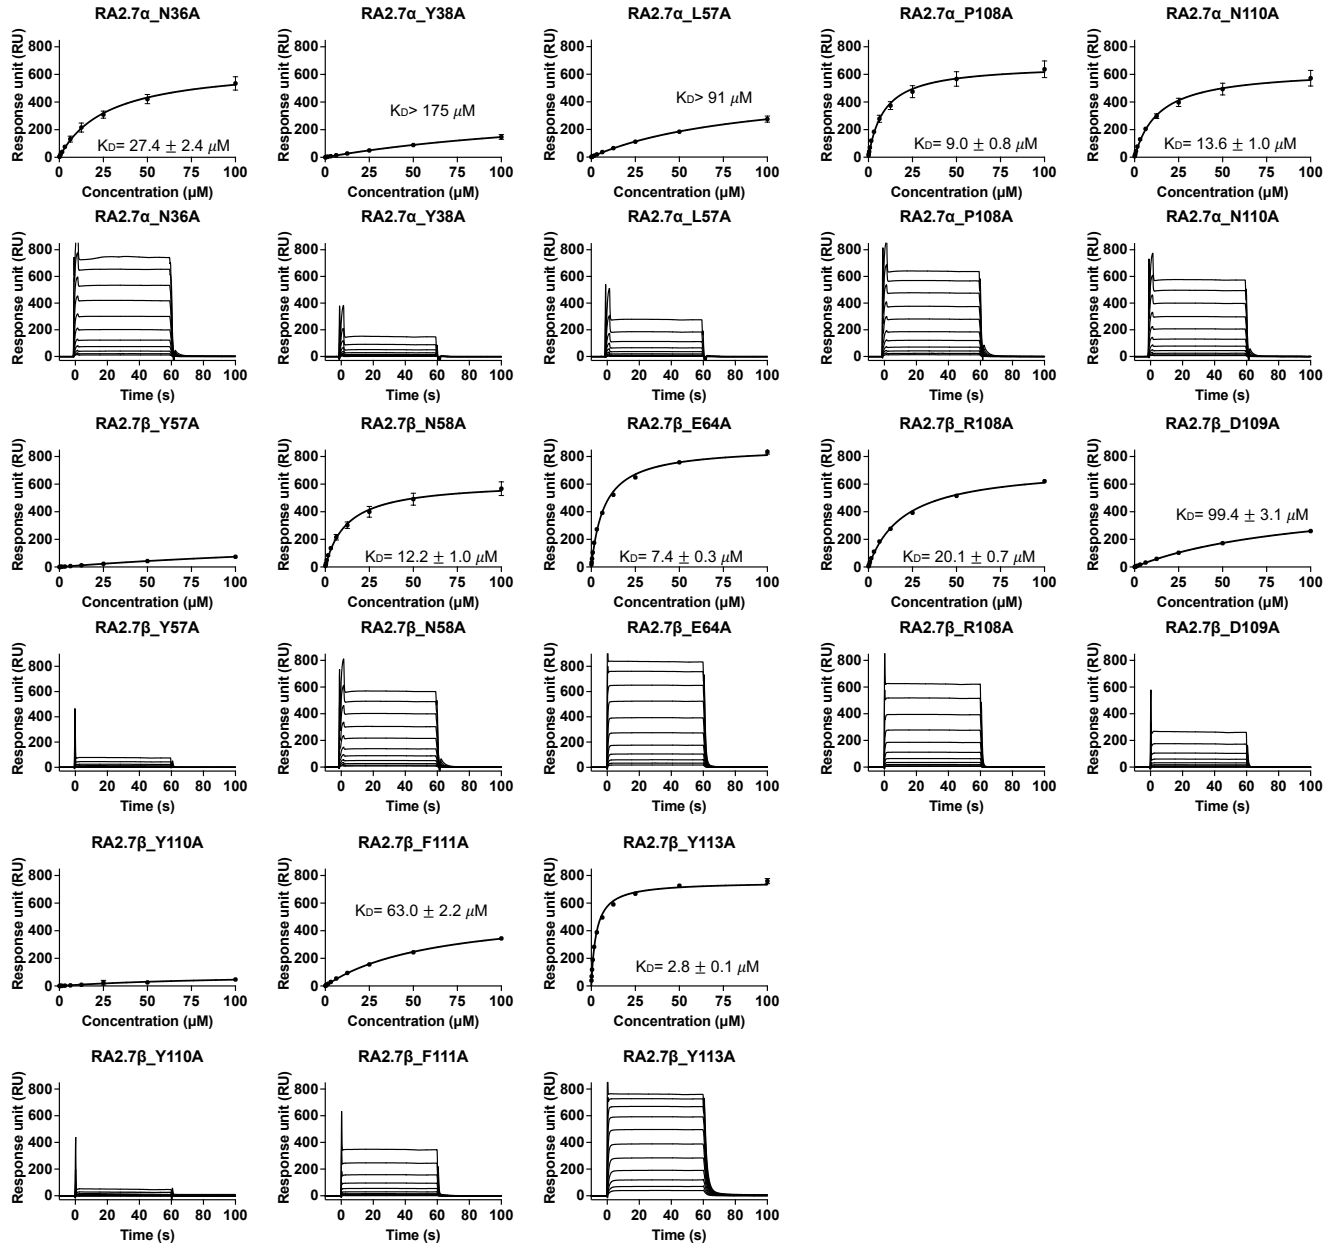

**Supplementary Fig. 5. Binding affinity measurement of RA2.7 TCR point mutations towards HLA-DR4 $\alpha$ -eno-15cit10-22V20G.** All SPR data were derived from three independent experiments ( $n=3$ ) for  $K_D$  determination and curve fitting with a single ligand binding model. Maximal TCRs concentration used is  $100 \mu\text{M}$  and HLA-DR4<sup>CLIP</sup> was used as reference flow cell to control nonspecific binding. Equilibrium response curves were normalised against the calculated maximum response and the measurements then combined. Data are mean  $\pm$  standard error, s.e.m.. Source data are provided as a Source Data file.

## Electro density map of peptides in ternary complex

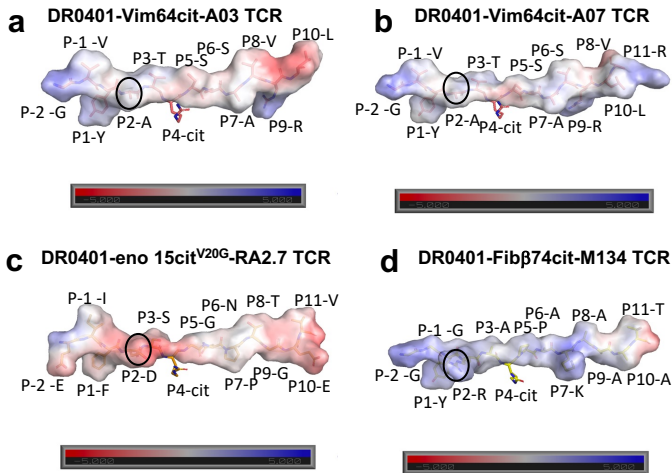

## Electro density map of peptides-MHC in ternary complex

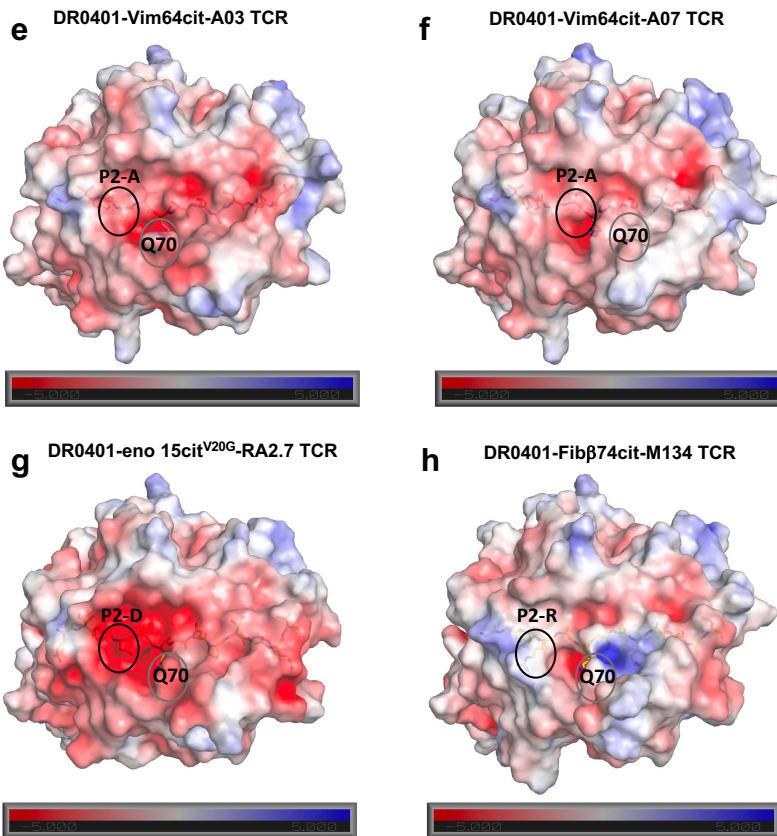

**Supplementary Fig. 6. Adaptive Poisson Boltzmann Solver-generated electrostatic surface of peptide or pHLA in ternary complexes (red, negative; blue, positive; white, neutral).** The view from the side, looking straight at the peptide binding groove of peptide **a** HLA-DR4<sup>Vim-64cit59-71</sup>-A03 TCR complex, **b** HLA-DR4<sup>Vim-64cit59-71</sup>-A07 TCR complex, **c** HLA-DR4 <sup>$\alpha$ -eno-15cit10-22V20G</sup>-RA2.7 TCR complex, **d** HLA-DR4<sup>-Fib $\beta$ -74cit</sup>-M134 TCR complex. The view from the top, looking straight into the peptide binding groove from **e** HLA-DR4<sup>Vim-64cit59-71</sup>-A03 TCR complex, **f** HLA-DR4<sup>Vim-64cit59-71</sup>-A07 TCR complex, **g** HLA-DR4 <sup>$\alpha$ -eno-15cit10-22V20G</sup>-RA2.7 TCR complex, **h** HLA-DR4<sup>-Fib $\beta$ -74cit</sup>-M134 TCR complex. Black circle is the position where P2 residue is located, grey circle is the position where the SE Gln<sup>70</sup> $\beta$  is located on the HLA-DR4  $\beta$ -chain.

**a** A03 TCR-HLA-DR4<sup>Vim-64cit59-71</sup>

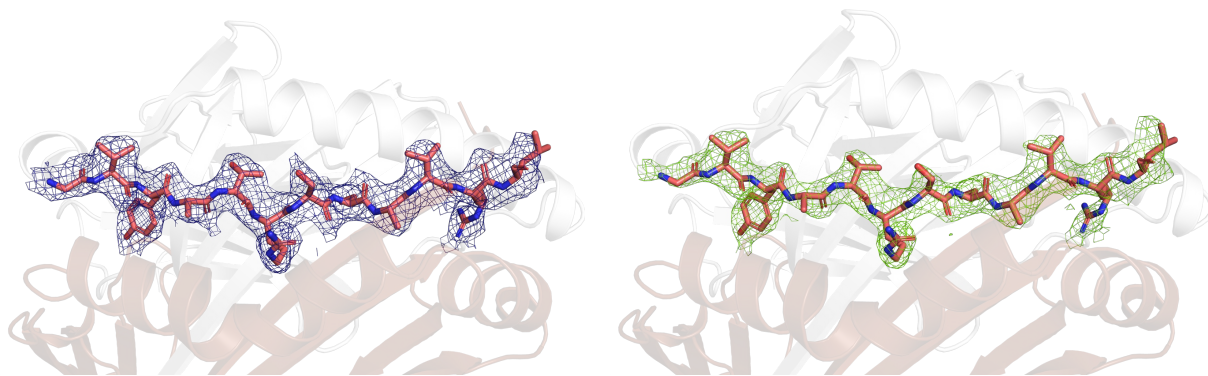

**b** A07 TCR-HLA-DR4<sup>Vim-64cit59-71</sup>

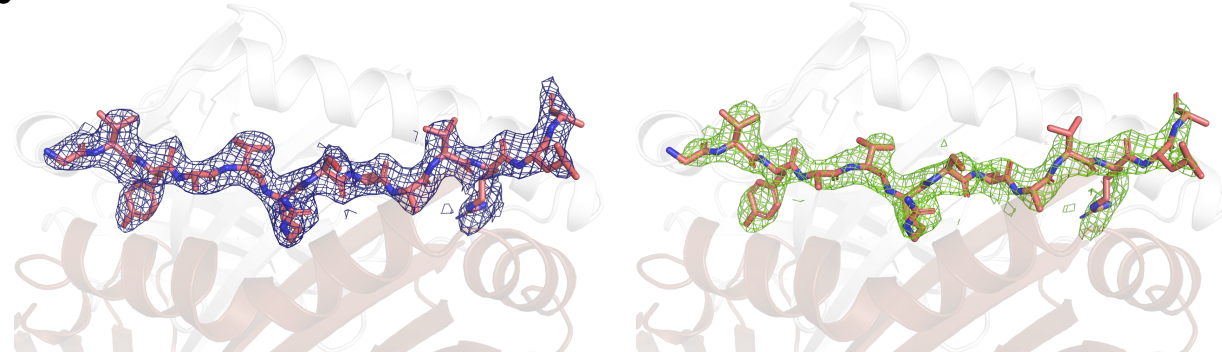

**c** RA2.7 TCR-HLA-DR4<sup>α-eno15cit10-22V20G</sup>

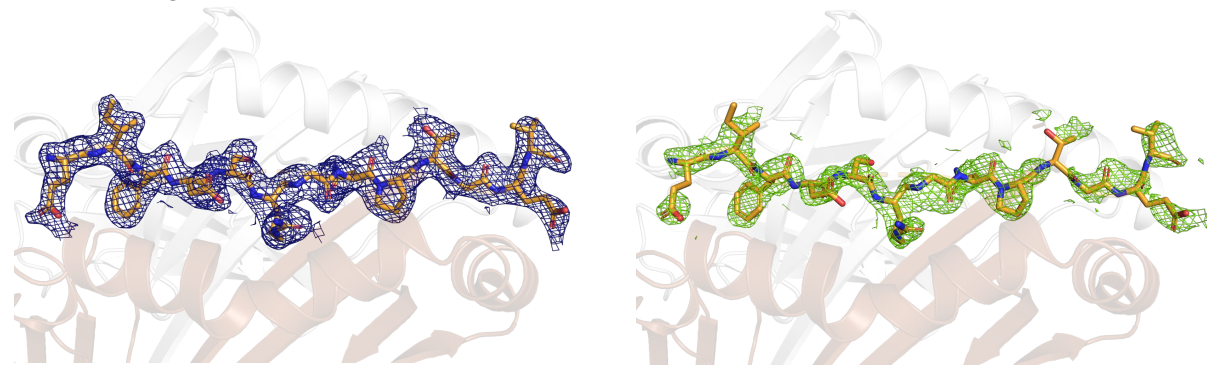

**Supplementary Fig. 7. Peptide antigen electron density map.** Electron density map of the peptide antigen for **a** A03 TCR-HLA-DR4<sup>Vim-64cit59-71</sup>, **b** A07 TCR-HLA-DR4<sup>Vim-64cit59-71</sup>, and **c** RA2.7 TCR-HLA-DR4<sup>α-eno15cit10-22V20G</sup> complexes are presented in refined 2mF<sub>o</sub>-DF<sub>c</sub> map (left; blue mesh) and SA Omit map (right; green mesh), respectively, contoured at 1σ. The HLA-DR4 α and β chains are coloured in white and brown, respectively. Vim-64cit<sub>59-71</sub> and α-eno15cit<sub>10-22</sub> peptides are coloured in pink and orange, respectively.

**Supplementary Table 1. Paired TCR $\alpha\beta$  sequences of confirmed HLA-DR4 $\alpha$ -eno-15cit10-22V20G-specific CD4<sup>+</sup> cells isolated from peripheral blood of ACPA<sup>+</sup> RA donor and HLA-DR4<sup>+</sup> healthy control donors. Epitope specificity was verified by tetramer staining of TCR transfectants.**

| Subject           | TRAV  | TRAJ | CDR1 $\alpha$ | CDR2 $\alpha$ | CDR3 $\alpha$   | TRBV | TBRD | TRBJ | CDR1 $\beta$ | CDR2 $\beta$ | CDR3 $\beta$    |
|-------------------|-------|------|---------------|---------------|-----------------|------|------|------|--------------|--------------|-----------------|
| <b>RA donor 2</b> | 26-1  | 49   | TISGNEY       | GLKNN         | CIVRASNTGNQFYF  | 20-1 | 2    | 2-7  | DFQATT       | SNEGSKA      | CSAATGTSGYEQYF  |
| <b>RA donor 2</b> | 27    | 26   | SVFSS         | VVTGGEV       | CAGKAGNYGQNFVF  | 19   | 1    | 2-2  | LNHDA        | SQIVND       | CASSTGGQNTGELFF |
| <b>HC 10195</b>   | 26-1  | 53   | TISGNEY       | GLKNN         | CIVRTSGGSNYKLTF | 2    | 1    | 2-1  | SNHLY        | FYNNEI       | CAGTYWNEQFF     |
| <b>HC 4737</b>    | 26-1* | 56   | TISGNEY       | GLKNN         | CIVRVAGANSKLTF  | 5-4  | 1    | 2-7  | SGHNT        | YYREEE       | CASSYDLAGPYEQYF |
| <b>HC 4737</b>    | 35    | 39   | SIFNT         | LYKAGEL       | CAGRNNAGNMLTF   | 2    | 2    | 1-2  | SNHLY        | FYNNEI       | CASNVIINYGTYF   |

RA = rheumatoid arthritis, HC = healthy control.

\* Two cells isolated for this clone

CDR3 nucleotide sequences are listed in Supplementary Table 10.



**Supplementary Table 2. Data collection and refinement statistics**

|                                        | A03 TCR-HLA-<br>DR4 <sup>Vim-64cit59-71</sup> | A07 TCR-HLA-<br>DR4 <sup>Vim-64cit59-71</sup> | RA2.7 TCR-HLA-<br>DR4 <sup><math>\alpha</math>-enolase-15cit10-22V20G</sup> |
|----------------------------------------|-----------------------------------------------|-----------------------------------------------|-----------------------------------------------------------------------------|
| <b>Data collection</b>                 |                                               |                                               |                                                                             |
| Space group                            | I121                                          | P 2 21 21                                     | C121                                                                        |
| Cell dimensions                        |                                               |                                               |                                                                             |
| a, b, c (Å)                            | 98.93, 59.97, 379.16                          | 58.60, 76.62, 224.18                          | 185.86, 58.55, 216.48                                                       |
| a, b, g (°)                            | 90, 90.16, 90                                 | 90, 90, 90                                    | 90, 113.60, 90                                                              |
| Resolution (Å)                         | 49.52-2.65<br>(2.72-2.65)                     | 46.55-2.75<br>(2.90-2.75)                     | 45.87-2.40<br>(2.44-2.40)                                                   |
| R <sub>sym</sub> or R <sub>merge</sub> | 0.102 (1.135)                                 | 0.161 (1.825)                                 | 0.07 (0.88)                                                                 |
| I / $\sigma$ I                         | 11.9 (1.9)                                    | 12.4 (1.7)                                    | 12.5 (2.1)                                                                  |
| Completeness (%)                       | 100 (100)                                     | 100 (100)                                     | 100.0 (100.0)                                                               |
| Redundancy                             | 7.0 (7.2)                                     | 13.4 (13.8)                                   | 6.2 (6.1)                                                                   |
| <b>Refinement</b>                      |                                               |                                               |                                                                             |
| Resolution (Å)                         | 49.486-2.65                                   | 46.548-2.75                                   | 45.87-2.40                                                                  |
| No. reflections                        | 65333                                         | 27098                                         | 84262                                                                       |
| R <sub>work</sub> / R <sub>free</sub>  | 0.2086/0.2441                                 | 0.2160/0.2635                                 | 0.2053/0.2322                                                               |
| No. atoms                              | 13047                                         | 6638                                          | 12917                                                                       |
| Protein                                | 12704                                         | 6513                                          | 12325                                                                       |
| Ligand/ion                             | 252                                           | 88                                            | 249                                                                         |
| Water                                  | 91                                            | 37                                            | 343                                                                         |
| B-factors                              | 79.48                                         | 71.21                                         | 62.89                                                                       |
| Protein                                | 79.47                                         | 71.17                                         | 63.34                                                                       |
| Ligand/ion                             | 103.80                                        | 89.38                                         | 70.82                                                                       |
| Water                                  | 67.79                                         | 66.51                                         | 52.44                                                                       |
| R.m.s. deviations                      |                                               |                                               |                                                                             |
| Bond lengths (Å)                       | 0.002                                         | 0.003                                         | 0.003                                                                       |
| Bond angles (°)                        | 0.539                                         | 0.521                                         | 0.606                                                                       |
| Rama allowed (%)                       | 99.81                                         | 99.88                                         | 99.94                                                                       |
| Rama favoured (%)                      | 96.89                                         | 95.22                                         | 96.5                                                                        |
| Rama Outlier (%)                       | 0.19                                          | 0.12                                          | 0.06                                                                        |

**Supplementary Table 3. TCR-pHLA complex statistics.**

| <b>TCR-pHLA</b>                             | <b>BSA<br/>(Å<sup>2</sup>)</b> | <b>Vα<br/>(%)</b> | <b>Vβ<br/>(%)</b> | <b>Peptide<br/>(%)</b> | <b>1α<br/>(%)</b> | <b>2α<br/>(%)</b> | <b>3α<br/>(%)</b> | <b>Fα<br/>(%)</b> | <b>1β<br/>(%)</b> | <b>2β<br/>(%)</b> | <b>3β<br/>(%)</b> | <b>Fβ<br/>(%)</b> | <b>K<sub>D</sub> (μM)</b> | <b>Angle<br/>(°)</b> |
|---------------------------------------------|--------------------------------|-------------------|-------------------|------------------------|-------------------|-------------------|-------------------|-------------------|-------------------|-------------------|-------------------|-------------------|---------------------------|----------------------|
| A03-HLA-DR4 <sup>Vim6-4cit59-71</sup>       | 2010                           | 54.5              | 45.5              | 27.1                   | 20.7              | 9.6               | 20.8              | 3.4               | 6.3               | 10.7              | 27.5              | 1                 | 6.2± 0.3μM                | 67                   |
| A07-HLA-DR4 <sup>Vim-64cit59-71</sup>       | 1665                           | 63.7              | 36.3              | 28.7                   | 23.1              | 8.7               | 29.6              | 2.3               | 0                 | 0                 | 36.3              | 0                 | 31.9± 1.5μM               | 61                   |
| RA2.7-HLA-DR4 <sup>Vim-64cit59-71v20G</sup> | 1940                           | 38                | 62                | 20.95                  | 17                | 3                 | 17                | 1                 | 7                 | 17                | 33                | 5                 | 7.1± 0.5μM                | 60                   |

**Supplementary Table 4. Contact table of A03 TCR- HLA-DR4<sup>Vim-64cit59-71</sup>**

| TCR segment                    | TCR residues | HLA-DR4                                 | Type of bond |
|--------------------------------|--------------|-----------------------------------------|--------------|
| <b>CDR1<math>\alpha</math></b> | A35          | H81 $\beta$                             | HB, VDW      |
|                                | Y36          | D76 $\beta$ , T77 $\beta$               | VDW          |
|                                | N38          | Q70 $\beta$                             | HB, VDW      |
| <b>FW<math>\alpha</math></b>   | K55          | D66 $\beta$                             | SB           |
| <b>CDR2<math>\alpha</math></b> | I57          | Q70 $\beta$                             | VDW          |
|                                | T58          | A73 $\beta$ , T77 $\beta$               | VDW          |
| <b>CDR3<math>\alpha</math></b> | T109         | Q70 $\beta$                             | HB, VDW      |
|                                | G110         | G58 $\alpha$                            | VDW          |
|                                | N111         | Q57 $\alpha$ , G58 $\alpha$             | VDW          |
|                                | Y112         | Q57 $\alpha$                            | HB, VDW      |
|                                | K113         | E55 $\alpha$                            | HB, VDW      |
| <b>CDR1<math>\beta</math></b>  | Y31          | Q57 $\alpha$ , A61 $\alpha$             | HB, VDW      |
| <b>FW<math>\beta</math></b>    | Y55          | Q57 $\alpha$                            | VDW          |
| <b>CDR2<math>\beta</math></b>  | Y57          | Q57 $\alpha$ , L60 $\alpha$             | VDW          |
| <b>CDR3<math>\beta</math></b>  | N110         | Y60 $\beta$ , Q64 $\beta$ , L67 $\beta$ | HB, VDW      |
|                                | S111         | D66 $\beta$                             | VDW          |
| TCR segment                    | TCR residues | Vim-64cit <sub>59-71</sub> peptide      | Type of bond |
| <b>CDR1<math>\alpha</math></b> | T28          | P-1-V                                   | VDW          |
|                                | S29          | P-1-V                                   | VDW          |
|                                | I30          | P-1-V                                   | VDW          |
|                                | A31          | P-1-V, P1-Y, P2-A                       | VDW          |
| <b>CDR3<math>\alpha</math></b> | T109         | P4-Cit, P5-S                            | VDW, HB      |
|                                | G110         | P3-T, P5-S                              | VDW          |
| <b>CDR1<math>\beta</math></b>  | D30          | P8-V                                    | VDW          |
| <b>CDR3<math>\beta</math></b>  | V109         | P5-S, P6-S                              | VDW          |
|                                | N110         | P8-V                                    | HB, VDW      |

VDW: Van der Waals interaction (cut-off at 4Å)

HB: hydrogen bond (cut-off at 3.5 Å)

SB: salt bridge (cut-off at 4.5 Å)

**Supplementary Table 5. Contact table of A07 TCR- HLA-DR4<sup>Vim-64cit59-71</sup>**

| <b>TCR segment</b>             | <b>TCR residues</b> | <b>HLA-DR4</b>                           | <b>Type of bond</b> |
|--------------------------------|---------------------|------------------------------------------|---------------------|
| <b>CDR1<math>\alpha</math></b> | S29                 | E55 $\alpha$                             | VDW                 |
|                                | A35                 | H81 $\beta$                              | VDW                 |
|                                | Y36                 | T77 $\beta$ , H81 $\beta$                | VDW                 |
| <b>FW<math>\alpha</math></b>   | K55                 | D66 $\beta$                              | SB                  |
| <b>CDR2<math>\alpha</math></b> | I57                 | E69 $\beta$ , T77 $\beta$                | VDW                 |
|                                | T58                 | A73 $\beta$                              | VDW                 |
| <b>CDR3<math>\alpha</math></b> | H109                | Q70 $\beta$ , A73 $\beta$ , T77 $\beta$  | HB, VDW             |
|                                | S110                | Q70 $\beta$                              | HB, VDW             |
|                                | S112                | A61 $\alpha$                             | VDW                 |
|                                | W113                | E55 $\alpha$                             | VDW                 |
| <b>CDR3<math>\beta</math></b>  | R109                | V65 $\alpha$                             | VDW                 |
|                                | T110                | Q64 $\beta$ , L67 $\beta$                | VDW                 |
|                                | G111                | Q70 $\beta$                              | HB, VDW             |
|                                | A112                | D66 $\beta$ , L67 $\beta$ , Q70 $\beta$  | VDW                 |
|                                | D115                | D66 $\beta$                              | VDW                 |
|                                |                     |                                          |                     |
| <b>TCR segment</b>             | <b>TCR residues</b> | <b>Vim-64cit<sub>59-71</sub> peptide</b> | <b>Type of bond</b> |
| <b>CDR1<math>\alpha</math></b> | A31                 | P-1V, P1-Y, P2-A                         | VDW                 |
| <b>CDR3<math>\alpha</math></b> | H109                | P4-Cit                                   | HB, VDW             |
|                                | S110                | P3-T, P4-Cit, P5-S                       | VDW                 |
| <b>CDR3<math>\beta</math></b>  | R109                | P8-V                                     | VDW                 |
|                                | T110                | P7-A, P8-V                               | VDW                 |
|                                | G111                | P5-S, P8-V                               | HB, VDW             |

VDW: Van der Waals interaction (cut-off at 4Å)

HB: hydrogen bond (cut-off at 3.5 Å)

SB: salt bridge (cut-off at 4.5 Å)

**Supplementary Table 6. Contact table of RA2.7 TCR- HLA-DR4 $\alpha$ -enolase-15cit10-22V20G**

| <b>TCR segment</b>             | <b>TCR residues</b> | <b>HLA-DR4</b>                                                       | <b>Type of bond</b> |
|--------------------------------|---------------------|----------------------------------------------------------------------|---------------------|
| <b>CDR1<math>\alpha</math></b> | G30                 | T77 $\beta$ , H81 $\beta$                                            | VDW                 |
|                                | N36                 | T77 $\beta$ , H81 $\beta$                                            | VDW, HB             |
|                                | Y38                 | Q70 $\beta$ , A73 $\beta$                                            | VDW                 |
| <b>CDR2<math>\alpha</math></b> | L57                 | T77 $\beta$                                                          | VDW                 |
| <b>CDR3<math>\alpha</math></b> | A109                | Q70 $\beta$                                                          | VDW                 |
|                                | N110                | G58a, N62a                                                           | VDW, HB             |
| <b>CDR1<math>\beta</math></b>  | Y38                 | V65a                                                                 | VDW                 |
| <b>CDR2<math>\beta</math></b>  | Y57                 | A64a, V65a, A68a                                                     | VDW                 |
|                                | N58                 | A68a                                                                 | VDW                 |
|                                | E64                 | K67a                                                                 | SB                  |
| <b>FW<math>\beta</math></b>    | S66                 | Q57a                                                                 | HB, VDW             |
|                                | E67                 | Q57a                                                                 | VDW                 |
| <b>CDR3<math>\beta</math></b>  | R108                | Y60 $\beta$ , Q64 $\beta$                                            | HB                  |
|                                | Y110                | Q70 $\beta$ , K71 $\beta$                                            | HB, VDW             |
|                                | F111                | Q64 $\beta$ , L67 $\beta$ , Q70 $\beta$                              | VDW                 |
|                                | Y113                | D66 $\beta$                                                          | VDW, HB             |
| <b>TCR segment</b>             | <b>TCR residues</b> | <b><math>\alpha</math>-enolase-15cit<sub>10-22</sub>V20G peptide</b> | <b>Type of bond</b> |
| <b>CDR1<math>\alpha</math></b> | N36                 | P2-D                                                                 | HB, VDW             |
| <b>CDR3<math>\alpha</math></b> | P108                | P2-D                                                                 | VDW                 |
|                                | N110                | P3-S, P4-Cit, P5-G                                                   | HB, VDW             |
| <b>CDR1<math>\beta</math></b>  | L37                 | P8-T                                                                 | VDW                 |
| <b>CDR2<math>\beta</math></b>  | Y57                 | P8-T                                                                 | HB, VDW             |
| <b>CDR3<math>\beta</math></b>  | D109                | P7-P, P8-T                                                           | HB, VDW             |
|                                | Y110                | P4-cit, P5-G, P6-N, P7-P                                             | HB, VDW             |
|                                | F111                | P7-P                                                                 | VDW                 |

VDW: Van der Waals interaction (cut-off at 4 Å)

HB: hydrogen bond (cut-off at 3.5 Å)

SB: salt bridge (cut-off at 4.5 Å)

**Supplementary Table 7. Antibody list**

| <b>Antibody name</b>                                                            | <b>Clone</b> | <b>Company</b>                       | <b>Dilution used</b> | <b>Catalog number</b> |
|---------------------------------------------------------------------------------|--------------|--------------------------------------|----------------------|-----------------------|
| BUV395 mouse anti-human CD3                                                     | UCHT1        | BD Biosciences                       | 1:100                | 563546                |
| APC Mouse Anti-Human CD69                                                       | FN50         | BD Biosciences                       | 1:100                | 555533                |
| anti-HLA-DR4                                                                    | LB3.1        |                                      |                      |                       |
| APC-Cy <sup>TM</sup> 7 Hamster Anti-Mouse TCR $\beta$ Chain                     | H57-597      | BD Biosciences                       | 1:200                | 560656                |
| FITC Rat Anti-Mouse CD45R/B220                                                  | RA3-6B2      | BD Biosciences                       | 1:400                | 553088                |
| FITC Mouse Anti-Mouse NK-1.1                                                    | PK136        | BD Biosciences                       | 1:400                | 553164                |
| FITC Rat anti-Mouse F4/80                                                       | BM8          | eBioscience, ThermoFisher Scientific | 1:400                | 11-4801-82            |
| BV711 Hamster Anti-Mouse CD3e                                                   | 145-2C11     | BD Biosciences                       | 1:200                | 563123                |
| BV605 Rat Anti-Mouse CD62L                                                      | MEL-14       | BD Biosciences                       | 1:400                | 563252                |
| BUV395 Rat Anti-Mouse CD4                                                       | GK1.5        | BD Biosciences                       | 1:200                | 563790                |
| Pacific Blue <sup>TM</sup> Rat Anti-Mouse CD8a                                  | 53-6.7       | BD Biosciences                       | 1:200                | 558106                |
| Alexa Fluor 700 Mouse anti-human CD14                                           | M5E2         | BD Biosciences                       | 1:100                | 557923                |
| Alexa Fluor 700 Mouse anti-human CD19                                           | HIB19        | BD Biosciences                       | 1:200                | 557921                |
| BV480 Mouse anti-human CD3                                                      | UCHT1        | BD Biosciences                       | 1:200                | 566105                |
| BUV395 mouse anti-human CD4                                                     | SK3          | BD Biosciences                       | 1:400                | 563550                |
| APC hamster anti-mouse TCR $\beta$ chain                                        | H57-597      | Biologend                            | 1:400                | 109212                |
| APC mouse anti-human CD3                                                        | UCHT1        | Biologend                            | 1:200                | 300412                |
| LIVE/DEAD <sup>TM</sup> Fixable Aqua Dead Cell Stain Kit, for 405 nm excitation |              | ThermoFisher Scientific              | 1:800                | L34966                |
| LIVE/DEAD Fixable Near-IR Dead Cell Stain Kit, for 633 or 635 nm excitation     |              | ThermoFisher Scientific              | 1:1000               | L10119                |
| Zombie NIR <sup>TM</sup> Fixable Viability Kit                                  |              | Biologend                            | 1:1000               | 423106                |
| BD Horizon <sup>TM</sup> Fixable Viability Stain 700 (FVS700)                   |              | BD Biosciences                       | 1:1000               | 564997                |

**Supplementary Table 8. Primers targeting mouse T cell receptor  $\alpha$  (TRA) and  $\beta$  (TRB) genes**

| <b>TRA gene(s) targeted by primer</b> | <b>External primer sequence</b> | <b>Internal primer sequence</b> | <b>Reference</b>   |
|---------------------------------------|---------------------------------|---------------------------------|--------------------|
| TRAV1                                 | 5' GCACATACAGCACCTCAG 3'        | 5' AACGTGAAGGCCAAGC 3'          |                    |
| TRAV2                                 | 5' CCACCAGGGACCACAG 3'          | 5' ACTCTGAGCCTGCCCT 3'          | 50 (Internal only) |
| TRAV3                                 | 5' GGCGAGCAGGTGGAG 3'           | 5' GCCCTCCTCACCTGAG 3'          | 50                 |
| TRAV4                                 | 5' TCTGSTCTGAGATGCAATTTT 3'     | 5' GGITIMAGGAACAAAGGAGAAT 3'    | 50                 |
| TRAV5-1/5-4(D)                        | 5' CTTCCYTTGGTATAAGCAAGA 3'     | 5' ATYCGTTCAAATATGGAAAGAAA 3'   | 50 (Internal only) |
| TRAV6-1/6-2                           | 5' CAGATGCAAGGTCAAGTGAC 3'      | 5' GGAGAAGGTCCACAGCTC 3'        | 50                 |
| TRAV6-3/6-4(D)                        | 5' AAGGTCCACAGCTCCTTC 3'        | 5' CAACTGCCAACACAAGG 3'         | 50                 |
| TRAV6(D)-5                            | 5' CTTCTCTGACTGTGAACTGTTC 3'    | 5' CAGTACCCAACCCTGTTCTG 3'      |                    |
| TRAV6-6                               | 5' AGATTCCGTGACTCAAACAG 3'      | 5' ACGGCTGGCCAGAAG 3'           | 50                 |
| TRAV6(D/N)-7                          | 5' GCCTCAAGGGACAAAGAG 3'        | 5' AAAGGAAGCAGCAGAGG 3'         |                    |
| TRAV7                                 | 5' AGAAGGTRCAGCAGAGCCCAGAATC 3' | 5' CAKGRCYTCYYTCAACTGCAC 3'     | 50                 |
| TRAV8                                 | 5' TGAAYTGYAGTTACAAGAC 3'       | 5' TAATCTTAATACGTTCAAATGAG 3'   |                    |
| TRAV9                                 | 5' CTCKSTGSAGCTGAGATGCAA 3'     | 5' CAGYTKCTCCTCAAGTACTAT 3'     |                    |
| TRAV10                                | 5' GGAGAGAAGGTTCGAGCAAC 3'      | 5' GAGGGAGACAGCGCTG 3'          |                    |
| TRAV11                                | 5' AAGACCCAAGTGGAGCAG 3'        | 5' AACAGGACACAGGCCAAAG 3'       | 50                 |
| TRAV12                                | 5' GACCCAGAMRGAAGGCCTG 3'       | 5' GCTGAACWGCACCTATCAG 3'       |                    |
| TRAV12-4                              | 5' GGGAGGAGCAATGGAGATGG 3'      | 5' CAGTGACCCAGAAGGAAGG 3'       |                    |
| TRAV13                                | 5' TCCTTGTTCTGCAGG 3'           | 5' TGCAGTGGTTTTACCAA 3'         | 50 (External only) |
| TRAV14                                | 5' GCAGCAGGTGAGACAAAG 3'        | 5' CTCTGACAGTCTGGGAAGG 3'       | 50                 |
| TRAV15                                | 5' CTGSAYTGTTTCATATRAGACAAGT 3' | 5' TTAGTGGAGAGATGGTTTT 3'       |                    |
| TRAV16                                | 5' GTACAAGCAAACAGCAAGTG 3'      | 5' ATTATTCTCTGAACTTTCAGAAGC 3'  | 50                 |
| TRAV17                                | 5' CAGTCCGTGGACCAGC 3'          | 5' TATGAAGGAGCCTCCCTG 3'        | 50                 |
| TRAV18                                | 5' CAAGATTTCACTGCACG 3'         | 5' TACTGGTACCGACAGGTC 3'        |                    |
| TRAV19                                | 5' CAAGTTAAACAAAGCTCTCCATC 3'   | 5' GCTGACTGTTCAAGAGGGA 3'       | 50 (Internal only) |
| TRAV21                                | 5' GTGCACTTGCTTGTAGC 3'         | 5' AATAGTATGGCTTTCCTGGC 3'      | 50                 |
| TRAC                                  | 5' GGCATCACAGGGAACG 3'          | 5' GCACATTGATTTGGGAGTC 3'       | 50                 |

| <b>TRB gene(s) targeted by primer</b> | <b>External primer sequence</b> | <b>Internal primer sequence</b> | <b>Reference</b>   |
|---------------------------------------|---------------------------------|---------------------------------|--------------------|
| TRBV1                                 | 5' TACCACGTGGTCAAGCTG 3'        | 5' GTATCCCTGGATGAGCTG 3'        | 50                 |
| TRBV2                                 | 5' CAGTATCTAGGCCACAATGC 3'      | 5' GGACAATCAGACTGCCTC 3'        | 50                 |
| TRBV3                                 | 5' CCCAAAGTCTTACAGATCCC 3'      | 5' GATATGGGGCAGATGGTG 3'        | 50                 |
| TRBV4                                 | 5' GACGGCTGTTTTCCAGAC 3'        | 5' CAGGTGGGAAATGAAGTG 3'        | 50                 |
| TRBV5                                 | 5' GGTATAAACAGAGCGCTGAG 3'      | 5' GCCAGAGCTCATGTTTCTC 3'       | 50                 |
| TRBV12                                | 5' GGGGTTGTCCAGTCTCC 3'         | 5' CCAGCAGATTCTCAGTCC 3'        | 50                 |
| TRBV13                                | 5' GCTGCAGTCACCCAAAG 3'         | 5' GTACTGGTATCGGCAGGAC 3'       | 50                 |
| TRBV14                                | 5' GCAGTCCACAGGAAGGG 3'         | 5' GGTATCAGCAGCCCAGAG 3'        | 50                 |
| TRBV15                                | 5' GAGTTACCCAGACACCCAG 3'       | 5' GTGTGAGCCAGTTTCAGG 3'        | 50                 |
| TRBV16                                | 5' CCTAGGCACAAGGTGACAG 3'       | 5' GAAGCAACTCTGTGGTGTG 3'       | 50                 |
| TRBV17                                | 5' GAAGCCAAACCAAGCAC 3'         | 5' GAACAGGGAAGCTGACAC 3'        | 50                 |
| TRBV19                                | 5' GATTGGTCAGGAAGGGC 3'         | 5' GGTACCGACAGGATTCAG 3'        | 50                 |
| TRBV20                                | 5' GGATGGAGTGTCAAGCTG 3'        | 5' GCTTGGTATCGTCAATCG 3'        | 50                 |
| TRBV23                                | 5' CTGCAGTTACACAGAAGCC 3'       | 5' GCCAGGAAGCAGAGATG 3'         | 50                 |
| TRBV24                                | 5' CAGACTCCACGATACCTGG 3'       | 5' GCACACTGCCTTTTACTGG 3'       | 50                 |
| TRBV26                                | 5' GGTGAAAGGGCAAGGAC 3'         | 5' GAGGTGTATCCCTGAAAAGG 3'      | 50                 |
| TRBV29                                | 5' GCTGGAATGTGGACAGG 3'         | 5' GTACTGGTATCGACAAGACCC 3'     | 50                 |
| TRBV30                                | 5' CCTCCTCTACCAAAGCC 3'         | 5' GGACATCTGTCAAAGTGGC 3'       | 50                 |
| TRBV31                                | 5' CTAACCTCTACTGGTACTGGCAG 3'   | 5' CTGTTGGCCAGGTAGAGTC 3'       | 50                 |
| TRBC                                  | 5' CCAGAAGGTAGCAGAGACCC 3'      | 5' CCTCCTTGCCATTCACCCAC 3'      | 50 (External only) |

Primers targeting TRAV and TRBV genes are sense. Primers targeting TRAC and TRBC genes are antisense. TRAV, T cell receptor V $\alpha$ , TRAC, T cell receptor C $\alpha$ ; TRBV, T cell receptor V $\beta$ , TRBC, T cell receptor C $\beta$ .



**Supplementary Table 9. Primers targeting human T cell receptor  $\alpha$  (TRA) and  $\beta$  (TRB) genes**

| TRA gene(s) targeted by primer | External primer sequence     | Internal primer sequence      | Reference |
|--------------------------------|------------------------------|-------------------------------|-----------|
| TRAV1                          | 5' AACTGCACGTACCAGACATC 3'   | 5' GCACCCACATTTCTKTCTTAC 3'   | 51        |
| TRAV2                          | 5' GATGTGCACCAAGACTCC 3'     | 5' CACTCTGTGTCCAATGCTTAC 3'   | 51        |
| TRAV3                          | 5' AAGATCAGGTCAACGTTGC 3'    | 5' ATGCACCTATTCAGTCTCTGG 3'   | 51        |
| TRAV4                          | 5' CTCATGGACTCATATGAAGG 3'   | 5' ATTATATCACGTGGTACCAACAG 3' | 51        |
| TRAV5                          | 5' CTTTTCTGAGTGTCCGAG 3'     | 5' TACACAGACAGCTCCTCCAC 3'    | 51        |
| TRAV6                          | 5' CACCCTGACCTGCAACTATAC 3'  | 5' TGGTACCGACAAGATCCAG 3'     | 51        |
| TRAV7                          | 5' GCAAATAACAGGGATGGG 3'     | 5' TATGAGAAGCAGAAAGGAAGAC 3'  |           |
| TRAV8-1                        | 5' CTCACTGGAGTTGGGATG 3'     | 5' GTCAACACCTTCAGCTTCTC 3'    | 51        |
| TRAV8-2, 8-4                   | 5' GCCACCCTGGTTAAAGG 3'      | 5' AGAGTGAAACCTCCTTCCAC 3'    | 51        |
| TRAV8-3                        | 5' CACTGTCTCTGAAGGAGCC 3'    | 5' TTTGAGGCTGAATTTAAGAGG 3'   | 51        |
| TRAV8-6                        | 5' GAGCTGAGGTGCAACTACTC 3'   | 5' AACCAAGGACTCCAGCTTC 3'     | 51        |
| TRAV8-7                        | 5' CTAACAGAGGCCACCCAG 3'     | 5' ATCAGAGGTTTTGAGGCTG 3'     | 51        |
| TRAV9-1, 9-2                   | 5' TGGTATGTCCAATATCCTGG 3'   | 5' GAAACCACTTCTTTCCACTTG 3'   | 51        |
| TRAV10                         | 5' CAAGTGGAGCAGAGTCCTC 3'    | 5' GAAAGAAGTGCCTCTTCAATG 3'   | 51        |
| TRAV12-1, 12-2, 12-3           | 5' CARTGTTCCAGAGGGAGC 3'     | 5' AAGATGGAAGGTTTACAGCAC 3'   | 51        |
| TRAV13-1                       | 5' CATCCTTCAACCCTGAGTG 3'    | 5' TCAGACAGTGCCTCAAACACTAC 3' | 51        |
| TRAV13-2                       | 5' CAGCGCCTCAGACTACTTC 3'    | 5' CAGTGAACATCTCTCTCTGC 3'    | 51        |
| TRAV14                         | 5' AAGATAACTCAAACCAACCAG 3'  | 5' AGGCTGTGACTCTGGACTG 3'     | 51        |
| TRAV16                         | 5' AGTGGAGCTGAAGTGCAAC 3'    | 5' GTCCAGTACTCCAGACAACG 3'    | 51        |
| TRAV17                         | 5' GGAGAAGAGGATCCTCAGG 3'    | 5' CCACCATGAACTGCAGTTAC 3'    | 51        |
| TRAV18                         | 5' TCCAGTATCTAAACAAAGAGCC 3' | 5' TGACAGTTCCTTCCACCTG 3'     | 51        |
| TRAV19                         | 5' AGGTAACTCAAGCGCAGAC 3'    | 5' TGTGACCTTGGACTGTGTG 3'     | 51        |
| TRAV20                         | 5' CACAGTCAGCGTTTAAGAG 3'    | 5' TCTGGTATAGGCAAGATCCTG 3'   | 51        |
| TRAV21                         | 5' TTCCTGCAGCTCTGAGTG 3'     | 5' AACTTGGTTCTCAACTGCAG 3'    | 51        |
| TRAV22                         | 5' GTCCTCCAGACCTGATTCTC 3'   | 5' CTGACTCTGTGAACAATTTGC 3'   | 51        |
| TRAV23                         | 5' TGCTTATGAGAACACTGCG 3'    | 5' TGCATTATTGATAGCCATACG 3'   | 51        |
| TRAV24                         | 5' CTCAGTCACTGCATGTTCAG 3'   | 5' TGCCTTACTGGTACAGATG 3'     | 51        |

|                |                              |                             |    |
|----------------|------------------------------|-----------------------------|----|
| TRAV25         | 5' GGA CTT CACCACGTACTGC 3'  | 5' TATAAGCAAAGGCCTGGTG 3'   | 51 |
| TRAV26-1       | 5' GCAAACCTGCCTTGTAATC 3'    | 5' CGACAGATTCCTCCAG 3'      | 51 |
| TRAV26-2       | 5' AGCCAAATTCAATGGAGAG 3'    | 5' TTCCTTGCCCTTGTAACCAC 3'  | 51 |
| TRAV27         | 5' TCAGTTTCTAAGCATCCAAGAG 3' | 5' CTCCTGTGTACTGCAACTCC 3'  | 51 |
| TRAV29         | 5' GCAAGTTAAGCAAATTCACC 3'   | 5' CTGCTGAAGGTCCTACATTC 3'  | 51 |
| TRAV30         | 5' CAACAACCAGTGCAGAGTC 3'    | 5' AGAAGCATGGTGAAGCAC 3'    | 51 |
| TRAV34         | 5' AGAACTGGAGCAGAGTCCTC 3'   | 5' ATCTCACCATAAACTGCACG 3'  | 51 |
| TRAV35         | 5' GGTCAACAGCTGAATCAGAG 3'   | 5' ACCTGGCTATGGTACAAGC 3'   | 51 |
| TRAV36         | 5' GAAGACAAGGTGGTACAAAGC 3'  | 5' ATCTCTGGTTGTCCACGAG 3'   | 51 |
| TRAV38-1, 38-2 | 5' GCACATATGACACCAGTGAG 3'   | 5' CAGCAGGCAGATGATTCTC 3'   | 51 |
| TRAV39         | 5' CTGTTCTGAGCATGCAG 3'      | 5' TCAACCACTTCAGACAGACTG 3' | 51 |
| TRAV40         | 5' GCATCTGTGACTATGAACTGC 3'  | 5' GGAGGCGGAAATATTAAGAC 3'  | 51 |
| TRAV41         | 5' AATGAAGTGGAGCAGAGTCC 3'   | 5' TTGTTTATGCTGAGCTCAGG 3'  | 51 |
| TRAC           | 5' GACCAGCTTGACATCACAG 3'    | 5' TGTTGCTCTTGAAGTCCATAG 3' | 51 |

| TRB gene(s) targeted by primer             | External primer sequence    | Internal primer sequence    | Reference |
|--------------------------------------------|-----------------------------|-----------------------------|-----------|
| TRBV2                                      | 5' TCGATGATCAATTCTCAGTTG 3' | 5' TTCCTCTGAAGATCCGGTC 3'   | 51        |
| TRBV3-1                                    | 5' CAAAATACCTGGTCACACAG 3'  | 5' AATCTTCACATCAATTCCTG 3'  | 51        |
| TRBV4-1, 4-2, 4-3                          | 5' TCGCTTCTCACCTGAATG 3'    | 5' CCTGCAGCCAGAAGACTC 3'    | 51        |
| TRBV5-1, 5-3, 5-4                          | 5' GATTCTCAGGKCKCCAGTTC 3'  | 5' CTTGGAGCTGGRSGACTC 3'    | 51        |
| TRBV5-5, 5-6, 5-7, 5-8                     | 5' GTACCAACAGGYCCTGGGT 3'   | 5' TCTGAGCTGAATGTGAACG 3'   | 51        |
| TRBV6-1, 6-2, 6-3, 6-5, 6-6, 6-7, 6-8, 6-9 | 5' ACTCAGACCCCAAATTC 3'     | 5' GTGTRCCCAGGATATGAACC 3'  | 51        |
| TRBV6-4                                    | 5' ACTGGCAAAGGAGAAGTCC 3'   | 5' TGGTTATAGTGTCTCCAGAGC 3' | 51        |
| TRBV7-1, 7-2, 7-3                          | 5' TRTGATCCAATTTTCAGGTCA 3' | 5' TCYACTCTGAMGWTCCAGCG 3'  | 51        |
| TRBV7-4, 7-6, 7-7, 7-8, 7-9                | 5' CGSWTCTYTG CAGARAGGC 3'  | 5' TGRMGATYCAGCGCACA 3'     | 51        |
| TRBV9                                      | 5' GATCACAGCAACTGGACAG 3'   | 5' GTACCAACAGAGCCTGGAC 3'   | 51        |
| TRBV10-1                                   | 5' CAGAGCCCAAGACACAAG 3'    | 5' TGGTATCGACAAGACCTGG 3'   |           |
| TRBV10-2                                   | 5' ACCTTGATGTGTCACCAGAC 3'  | 5' GGAACACCAGTGA CTCTGAG 3' |           |

|                      |                              |                             |                    |
|----------------------|------------------------------|-----------------------------|--------------------|
| TRBV11-1, 11-2, 11-3 | 5' CGATTTTCTGCAGAGACGC 3'    | 5' GACTCCACTCTCAAGATCCA 3'  | 51                 |
| TRBV12-3, 12-4, 12-5 | 5' ARGTGACAGARATGGGACAA 3'   | 5' CYACTCTGARGATCCAGCC 3'   | 51                 |
| TRBV13               | 5' AGCGATAAAGGAAGCATCC 3'    | 5' CATTCTGAACTGAACATGAGC 3' | 51                 |
| TRBV14               | 5' CCAACAATCGATTCTTAGCTG 3'  | 5' ATTCTACTCTGAAGGTGCAGC 3' | 51                 |
| TRBV15               | 5' AGTGACCCTGAGTTGTTCTC 3'   | 5' ATAACTTCCAATCCAGGAGG 3'  | 51                 |
| TRBV16               | 5' GTCTTTGATGAAACAGGTATGC 3' | 5' CTGTAGCCTTGAGATCCAGG 3'  | 51 (External only) |
| TRBV17               | 5' CAGACCCCCAGACACAAG 3'     | 5' TGTTCACTGGTACCGACAG 3'   | 51                 |
| TRBV18               | 5' CATAGATGAGTCAGGAATGCC 3'  | 5' CGATTTTCTGCTGAATTTCC 3'  | 51                 |
| TRBV19               | 5' AGTTGTGAACAGAATTTGAACC 3' | 5' TTCCTCTCACTGTGACATCG 3'  | 51                 |
| TRBV20-1             | 5' AAGTTTCTCATCAACCATGC 3'   | 5' ACTCTGACAGTGACCAGTGC 3'  | 51                 |
| TRBV23-1             | 5' GCGATTCTCATCTCAATGC 3'    | 5' GCAATCCTGTCCTCAGAAC 3'   | 51                 |
| TRBV24-1             | 5' CCTACGGTTGATCTATTACTCC 3' | 5' GATGGATACAGTGTCTCTCGA 3' | 51                 |
| TRBV25-1             | 5' ACTACACCTCATCCACTATTCC 3' | 5' CAGAGAAGGGAGATCTTTCC 3'  | 51                 |
| TRBV27, 28           | 5' TGGTATCGACAAGACCCAG 3'    | 5' TTCYCCCTGATYCTGGAGTC 3'  | 51                 |
| TRBV29-1             | 5' TTCTGGTACCGTCAGCAAC 3'    | 5' TCTGACTGTGAGCAACATGAG 3' | 51                 |
| TRBV30               | 5' TCCAGCTGCTCTTCTACTCC 3'   | 5' AGAATCTCTCAGCCTCCAGAC 3' | 51                 |
| TRBC                 | 5' TAGAACTGGACTTGACAGCG 3'   | 5' TTCTGATGGCTCAAACACAG 3'  | 51                 |

Primers targeting TRAV and TRBV genes are sense. Primers targeting TRAC and TRBC genes are antisense. TRAV, T cell receptor V $\alpha$ , TRAC, T cell receptor C $\alpha$ ; TRBV, T cell receptor V $\beta$ , TRBC, T cell receptor C $\beta$ .

**Supplementary Table 10. CDR3 $\alpha$  and CDR3 $\beta$  nucleotide sequences for TCRs listed in Figure 1c, Figure 2c and Supp Table 1.**

| Figure       | CDR3 $\alpha$ amino acid sequence | CDR3 $\beta$ amino acid sequence | CDR3 $\alpha$ nucleotide sequence             | CDR3 $\beta$ nucleotide sequence                 |
|--------------|-----------------------------------|----------------------------------|-----------------------------------------------|--------------------------------------------------|
| Fig. 1c      | CALGDSNYQLIW                      | CAACGAGGAGQNTLYF                 | tgtgctctgggtgatagcaactatcagttgatctgg          | tgtgcccgctgctggggctggggggctggtcaaaacaccttgtacttt |
|              | CALGDHSGSWQLIF                    | CASSLRTGANSDYTF                  | tgtgctctgggtgatcattctggcagctggcaactcatcttt    | tgtgccagcagctctacggacaggggcaactccgactacaccttc    |
|              | CALGDTGNYKYVF                     | CASSGHNSGNTLYF                   | tgtgctctgggtgatacaggaactacaaatacgtcttt        | tgtgccagcagtggaacataaattctgaaatacgtctatcttt      |
|              | CALGDTGNYKYVF                     | CASSAVNSGNTLYF                   | tgtgctctgggtgatacaggaactacaaatacgtcttt        | tgtgccagcagtgagtggaattctgaaatacgtctatcttt        |
|              | CAAGITGNTGKLI                     | CASSQFRDRGAEQFF                  | tgtgctctgggtataacaggcaataaccggaaaactcatcttt   | tgtgccagcagccaattccgggacaggggtgctgagcagttcttc    |
|              | CALGPSGGNYKPTF                    | CASSPTSSNERLFF                   | tgcgctctggggccctcaggaggaaactacaaactacgttt     | tgtgccagcagcccacatcttccaacgaaagattatctttc        |
|              | CALNQGGSAKLIF                     | CASSQDPSNTGQLYF                  | tgcgctcttaatacaaggagggtctgcaagctcatcttt       | tgtgccagcagccaagaccatcaaacaccgggagctctacttt      |
|              | CALSGANTGKLTF                     | CASSQDRSNTVEFF                   | tgcgctctgagtgaggtaaacactggaagctcacgttt        | tgtgccagcagccaagacaggtcaaacacagaagtctcttt        |
|              | CALRTGGYKVVVF                     | CASSQDSANTEVFF                   | tgcgctctgcgactggaggctataaagtggctcttt          | tgtgccagcagccaagattcagcaaacacagaagtctcttt        |
|              | CALGTGGYKVVVF                     | CASSRDNSNSDYTF                   | tgcgctctggggactggaggctataaagtggctcttt         | tgtgccagcagccgcaactcaactccgactacaccttc           |
|              | CASGTGGYKVVVF                     | CASSLEQNSDYTF                    | tgcgctctcgggactggaggctataaagtggctcttt         | tgtgccagcagcttagaacagtcaactccgactacaccttc        |
|              | CALRNTNTGKLT                      | CASSPRHSGNTLYF                   | tgcgctctgagaaacaccaatacaggcaaatcaactcttt      | tgtgccagcagccccgacattctgaaatacgtctatcttt         |
|              | CALNNGGSNAKLT                     | CASSPQTGGYEQYF                   | tgcgctctgaatggaggaagcaatgcaagctaaccttc        | tgtgccagcagccccagactgggggtatgaacagacttc          |
|              | CALTGGSNAKLT                      | CASSQGHERLFF                     | tgcgctctgactggaggaagcaatgcaagctaaccttc        | tgtgccagcagccaagggcacgaaagattatctttc             |
|              | CALGSGGNYKPTF                     | CASSQNSGNTLYF                    | tgcgctctgggctcaggaggaaactacaaactacgttt        | tgtgccagcagcagcaaaattctgaaatacgtctatcttt         |
|              | CALGTGGYKVVVF                     | CASSDFSVEQYF                     | tgcgctctggggactggaggctataaagtggctcttt         | tgtgccagcagtgatcttccggtgaaacagacttc              |
|              | CAYYGSSGNKLI                      | CASSFRGDNSTLYF                   | tgcgcttattatgggagcagtggaacaagctcatcttt        | tgtgccagcagtttcaggggtgataattcgcccctacttt         |
|              | CALSDGGQKLVF                      | CASGDFRAEQFF                     | tgcgctctgagtgatgggtggccagaagctgggtttt         | tgtgccagcagtgatcttccgggtgagcagttcttc             |
|              | CALGGGSALGRLHF                    | CASSRGGTANTGQLYF                 | tgtgctctgggtggaggttcagccttagggaggctgcatcttt   | tgtgctagcagtagaggcggaacagcaaacaccgggagctctacttt  |
|              | CALSVPNNAKLT                      | CASSLGQSSYEQYF                   | tgtgctctgagtgctccgaataatgcaggtgccaagctcacattc | tgtgccagcagctctcgggaggggagctcctatgaacagacttc     |
|              | CALRGSGGNYKPTF                    | CAWSLGTGQDTQYF                   | tgcgctctgaggggtcaggaggaaactacaaactacgttt      | tgtgctcggagcttagggacagggcaagacaccagactcttt       |
|              | CALSGGNYKPTF                      | CAWSLGQGGNERLFF                  | tgcgctctgtcaggaggaaactacaaactacgttt           | tgtgctcggagcttaggtcaggggggaaacgaaagattatctttc    |
| Fig. 2c      | CIVRVNYGQNFVF                     | CASSQAGPLHF                      | tgcacgtcagagttaactatggtcagaattttgtcttt        | tgtgccagcagccaagcgggaccctccacttt                 |
|              | CIVNPANTGNQFYF                    | CASRRDYFSYEQYF                   | tgcacgtcaatcctggaacaccggtaaccagttctatcttt     | tgtgccagcagaaggactatctctcactagcagacttc           |
| Supp Table 1 | CIVRASNTGNQFYF                    | CSAATGTSGYEQYF                   | tgcacgtcagagcttgaacaccggtaaccagttctatcttt     | tgcagtgctgctaccgggactagcggctacgagcagacttc        |
|              | CAGKAGNYGQNFVF                    | CASSTGGQNTGELFF                  | tgtgcagggaaagctgggaactatggtcagaattttgtcttt    | tgtgccagtagtaccggggacagaaacaccggggagctgttttt     |
|              | CIVRTSGGSNYKLT                    | CAGTYWNEQFF                      | tgcacgtcagaacaagtggaggtagcaactataaactgacattt  | tgtgccgggactactggaatgagcagttcttc                 |
|              | CIVRVAGANSKLT                     | CASSYDLAGPYEQYF                  | tgcacgtcagagtcgctggagccaatagtaagctgacattt     | tgtgccagcagttatgatctagcggggccctacgagcagacttc     |
|              | CAGRNNAGNMLTF                     | CASNVIINYGYTF                    | tgtgctggccgaaataatgcaggcaacatgctcaccttt       | tgtgccagcaatgctgggattattaactatggctacaccttc       |
